# Supplementary material
Source: publisher figshare collection journal article supplement (https://sage.figshare.com/ndownloader/files/14569403)
Supplement: Supplementary file 1 [file 14569403]

## SAMPLE QUALITY AND DATA ABSTRACTION FORM

### UNCONTROLLED OBSERVATIONAL STUDIES:

**Reviewer Name:**

**Article #:**

### Research questions

What are the characteristics of injury to the orofacial region in physically abused children and adolescents aged 0-17 years?

Is there a difference in the orofacial injury patterns between physically abused and non-abused children and adolescents?

### Inclusion and exclusion criteria

| Inclusion criteria                        | comment |
|-------------------------------------------|---------|
| Peer reviewed articles                    |         |
| Peer reviewed thesis                      |         |
| Intraoral and/or facial injury patterns   |         |
| Cases of physical abuse in the 0-17 years |         |
| English language articles                 |         |

| Exclusion criteria                                                               | Comment |
|----------------------------------------------------------------------------------|---------|
| Single case reports                                                              |         |
| Physical abuse that result to children who witness family violence               |         |
| Dental neglect                                                                   |         |
| Review articles                                                                  |         |
| Ritualistic abuse                                                                |         |
| Bite mark injury cases on body other than orofacial region                       |         |
| Child sexual and emotional abuse                                                 |         |
| Case series containing less than 10 cases                                        |         |
| Book chapters or conference proceedings                                          |         |
| Non English articles                                                             |         |
| Eyes or nasal cavity internal injuries that are out of scope of dental expertise |         |

|                           |  |
|---------------------------|--|
| Sample size               |  |
| Prospective/retrospective |  |

Ranking of abuse and unintentional injury modified from CardiffCochranegroup:<http://www.core-info.cardiff.ac.uk/methodology/oral-injuries/1277-2>

| Ranking   | Criteria used to define abuse                                                                        |
|-----------|------------------------------------------------------------------------------------------------------|
| 1         | Abuse confirmed at case conference or civil or criminal court proceedings or admitted by perpetrator |
| 2         | Abuse confirmed by stated criteria including multidisciplinary assessment                            |
| 3         | Abuse defined by stated criteria                                                                     |
| 4         | Abuse stated but no supporting detail given                                                          |
| 5         | Suspected abuse                                                                                      |
| Comments: |                                                                                                      |

| Ranking of evidence by study type |                                   |
|-----------------------------------|-----------------------------------|
| 1                                 | Cohort study / longitudinal study |
| 2                                 | Case-control study                |
| 3                                 | Cross-sectional                   |

| Ranking   | Criteria used to define abuse                                                                        |
|-----------|------------------------------------------------------------------------------------------------------|
| 1         | Abuse confirmed at case conference or civil or criminal court proceedings or admitted by perpetrator |
| 2         | Abuse confirmed by stated criteria including multidisciplinary assessment                            |
| 3         | Abuse defined by stated criteria                                                                     |
| 4         | Abuse stated but no supporting detail given                                                          |
| 5         | Suspected abuse                                                                                      |
| Comments: |                                                                                                      |

**Study quality Criteria** [adopted from the Monash and Cochrane guide to systematic reviews]

Has an adequate literature review done?

Are the cases defined precisely keeping in view the aims of the systematic review?

Were the cases representative of the defined population?

Was there an established reliable system for selecting all the cases serving as sample population? [inclusion and exclusion criteria]

Has the methodology been adhered to rigorously?

Were the cases in sufficient numbers to have statistical power?

Have the results been clearly presented?

Were all results considered?

Were Statistical methods applied and were they appropriate?

Has statistical analysis been performed to control confounding factors?

Were the conclusions valid?

Additional comments

Strengths and limitations:

Implications for research

|                                 |  |
|---------------------------------|--|
| Author name<br>Publication year |  |
| Time span of actual study       |  |
| Institutional setting           |  |
| Number of children              |  |
| Age groups                      |  |
| Gender                          |  |
| Coexistent injuries             |  |
| *Comorbidities                  |  |
| Fatal/live                      |  |

|                                      |  |
|--------------------------------------|--|
| Disabled child data                  |  |
| Radiological investigations          |  |
| Repeat or fresh abuse                |  |
| Total cases with oro-facial injuries |  |
| injuries to face                     |  |

|                    |  |
|--------------------|--|
| Intraoral injuries |  |
|--------------------|--|



## CONTROLLED/ COMPARATIVE STUDIES

Reviewer Name:

Article number # & title:

### Research questions

What are the characteristics of injury to the orofacial region in physically abused children and adolescents aged 0-17 years?

Is there a difference in the orofacial injury patterns between physically abused and non-abused children and adolescents?

### Inclusion and exclusion criteria

| Inclusion criteria                        | comment |
|-------------------------------------------|---------|
| Peer reviewed articles                    |         |
| Peer reviewed thesis                      |         |
| Intraoral and/or facial injury patterns   |         |
| Cases of physical abuse in the 0-17 years |         |
| English language articles                 |         |
|                                           |         |

| Exclusion criteria                                                               | Comment |
|----------------------------------------------------------------------------------|---------|
| Single case reports                                                              |         |
| Physical abuse that result to children who witness family violence               |         |
| Dental neglect                                                                   |         |
| Review articles                                                                  |         |
| Ritualistic abuse                                                                |         |
| Bite mark injury cases on body other than orofacial region                       |         |
| Child sexual and emotional abuse                                                 |         |
| Case series containing less than 10 cases                                        |         |
| Book chapters or conference proceedings                                          |         |
| Non English articles                                                             |         |
| Eyes or nasal cavity internal injuries that are out of scope of dental expertise |         |
|                                                                                  |         |
|                                                                                  |         |

|                           |  |
|---------------------------|--|
| Sample                    |  |
| Retrospective/prospective |  |

Ranking of abuse and unintentional injury modified from CardiffCochranegroup:<http://www.core-info.cardiff.ac.uk/methodology/oral-injuries/1277-2>

(tick wherever applicable)

| Criteria used to define abuse                                                                        | Abuse rank | Criteria for defining unintentional injury                                   | Injury Rank |
|------------------------------------------------------------------------------------------------------|------------|------------------------------------------------------------------------------|-------------|
| Abuse confirmed at case conference or civil or criminal court proceedings or admitted by perpetrator | 1          | Independently witnessed injury or forensic recreation of scene               | 1           |
| Abuse confirmed by stated criteria including multidisciplinary assessment                            | 2          | By multidisciplinary assessment and child protection clinical investigations | 2           |
| Abuse defined by stated criteria                                                                     | 3          | Unintentional injury defined by stated criteria                              | 3           |
| Abuse stated but no supporting detail given                                                          | 4          | Unintentional injury stated but no detail given                              | 4           |
| Suspected abuse                                                                                      | 5          | No attempt made to exclude abuse / no detail given                           | 5           |

Comments:

| Ranking of evidence by study type |                                   |
|-----------------------------------|-----------------------------------|
| 1                                 | Cohort study / longitudinal study |
| 2                                 | Case-control study                |
| 3                                 | Cross-sectional                   |

| Grade     | Type of evidence                                                        |
|-----------|-------------------------------------------------------------------------|
| 1         | Evidence obtained from a controlled observational study.                |
| 2         | Evidence obtained from a uncontrolled observational or analytical study |
| 3         | studies using purely qualitative methods                                |
| 4         | Evidence obtained from studies that are case series or case studies     |
| Comments: |                                                                         |

**Study quality Criteria [adopted from the Monash and Cochrane guide to systematic reviews]**

Has an adequate literature review done?

Are the cases defined precisely keeping in view the aims of the systematic review?

Were the study cases representative of the defined population?

Was there an established reliable system for selecting all the cases serving as sample population? [inclusion and exclusion criteria]

Has the methodology been adhered to rigorously?

Were the cases in sufficient numbers to have statistical power?

Was a comparative non-abused group included?

Were the controls representative of the defined case population

Was the Oro-facial injury rate high in control groups?

Is the control group matched on as many as variables as possible?

Were there as many as control cases as the main sample population?

Have the results been clearly presented?

Were all results considered?

Were Statistical methods applied and were they appropriate?

Has statistical analysis been performed to control confounding factors?

Were the conclusions valid?

Additional comments:

Strengths and limitations:

Implications for research:

|                                 |             |               |
|---------------------------------|-------------|---------------|
| Author name<br>Publication year |             |               |
| Time span of<br>actual study    |             |               |
| Institutional<br>setting        |             |               |
|                                 | ABUSE GROUP | CONTROL GROUP |
| Number of<br>children           |             |               |
| Age groups                      |             |               |



|                             |  |  |
|-----------------------------|--|--|
| Gender                      |  |  |
| Coexistent injuries         |  |  |
| Comorbidities               |  |  |
| Fatal/live                  |  |  |
| Disabled child data         |  |  |
| Radiological investigations |  |  |

|                                      |  |  |
|--------------------------------------|--|--|
| Repeat or fresh abuse                |  |  |
| Total cases with oro-facial injuries |  |  |
| injuries to face                     |  |  |
| Intraoral injuries                   |  |  |
